# Supplementary material for: Functional multi-organelle units control inflammatory lipid metabolism of macrophages
Source: PubMed Central journal article supplement (PMC11321999; doi:10.1038/s41556-024-01457-0), 2024-07-05
Supplement: 41556_2024_1457_MOESM1_ESM.pdf [file 41556_2024_1457_MOESM1_ESM.pdf]

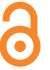

---

# Functional multi-organelle units control inflammatory lipid metabolism of macrophages

---

In the format provided by the authors and unedited

---

# Supplementary Information Figure

**a** gating strategy for intracellular staining of organelle markers used for OrgaPlexing

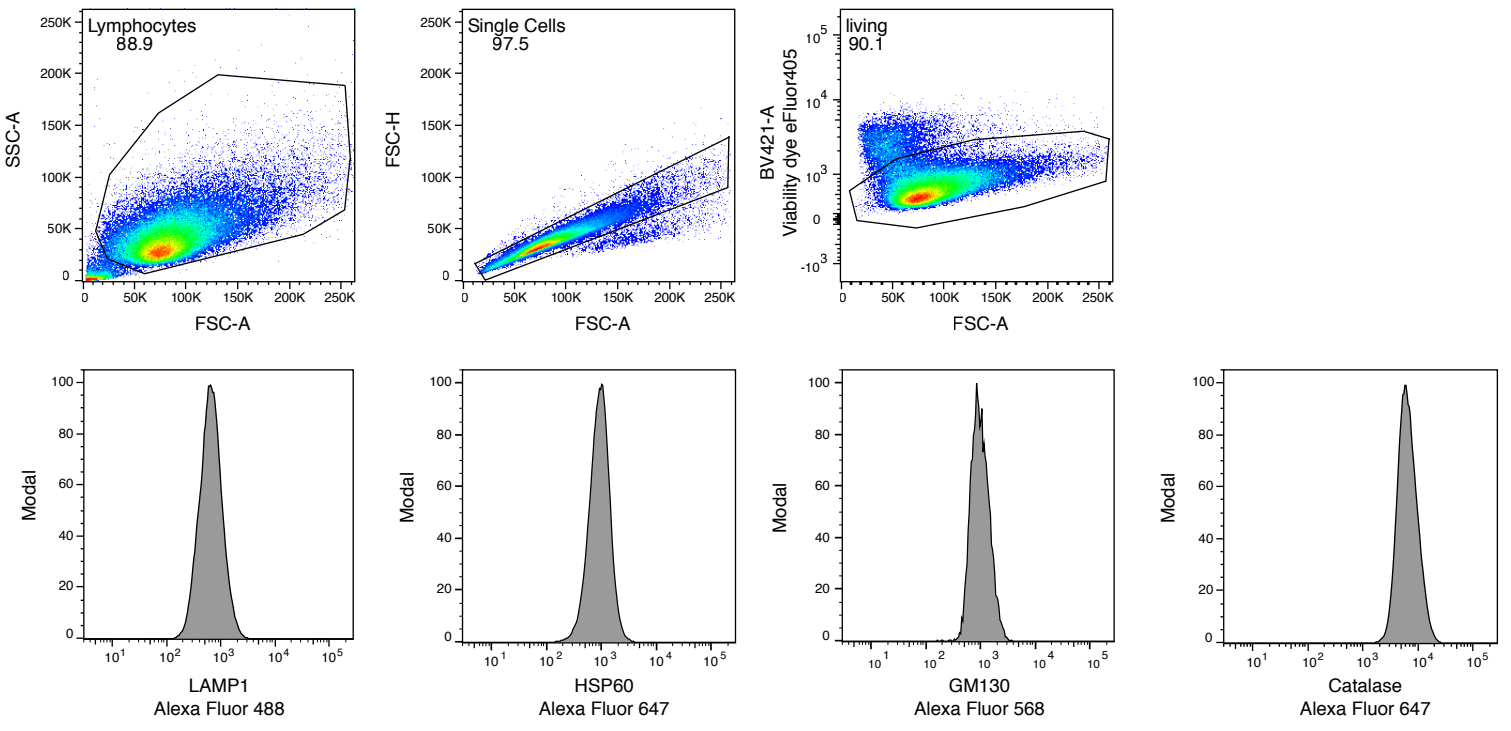

**b** gating strategy for living cells stained with CellROX, MitoSOX, MitotrackerGreen and TMRM

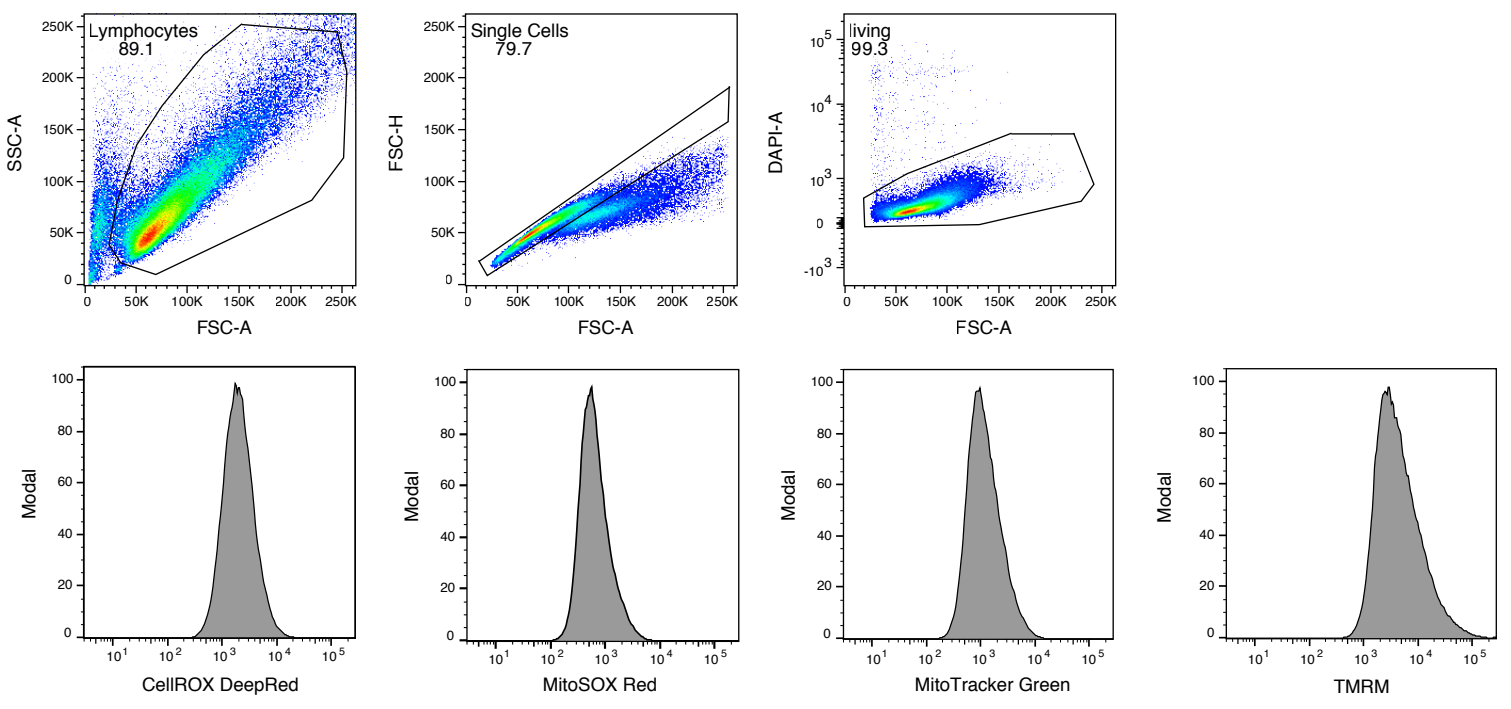

**Supplemental Information Fig. 1: Gating strategy for flow cytometry analysis.** **a** Gating strategy for organelle markers used for OrgaPlexing. BMDMs were gated for single cells, that were negative for Viability Dye eFluor405 (top). Representative histograms of organelle marker stainings for LAMP1, HSP60, GM130 and Catalase (bottom). **b** Gating strategy for BMDMs stained with intracellular dyes. BMDMs were gated for single cells, that were negative for DAPI (top). Representative histograms of CellROX, MitoSOX, MitoTracker and TMRM stainings (bottom).
