# Supplementary material for: Functional multi-organelle units control inflammatory lipid metabolism of macrophages
Source: PubMed Central journal article supplement (PMC11321999; doi:10.1038/s41556-024-01457-0), 2024-07-05

**Supplementary Figure 5**  
 Source Data for ED Figure 9, Western Blot images

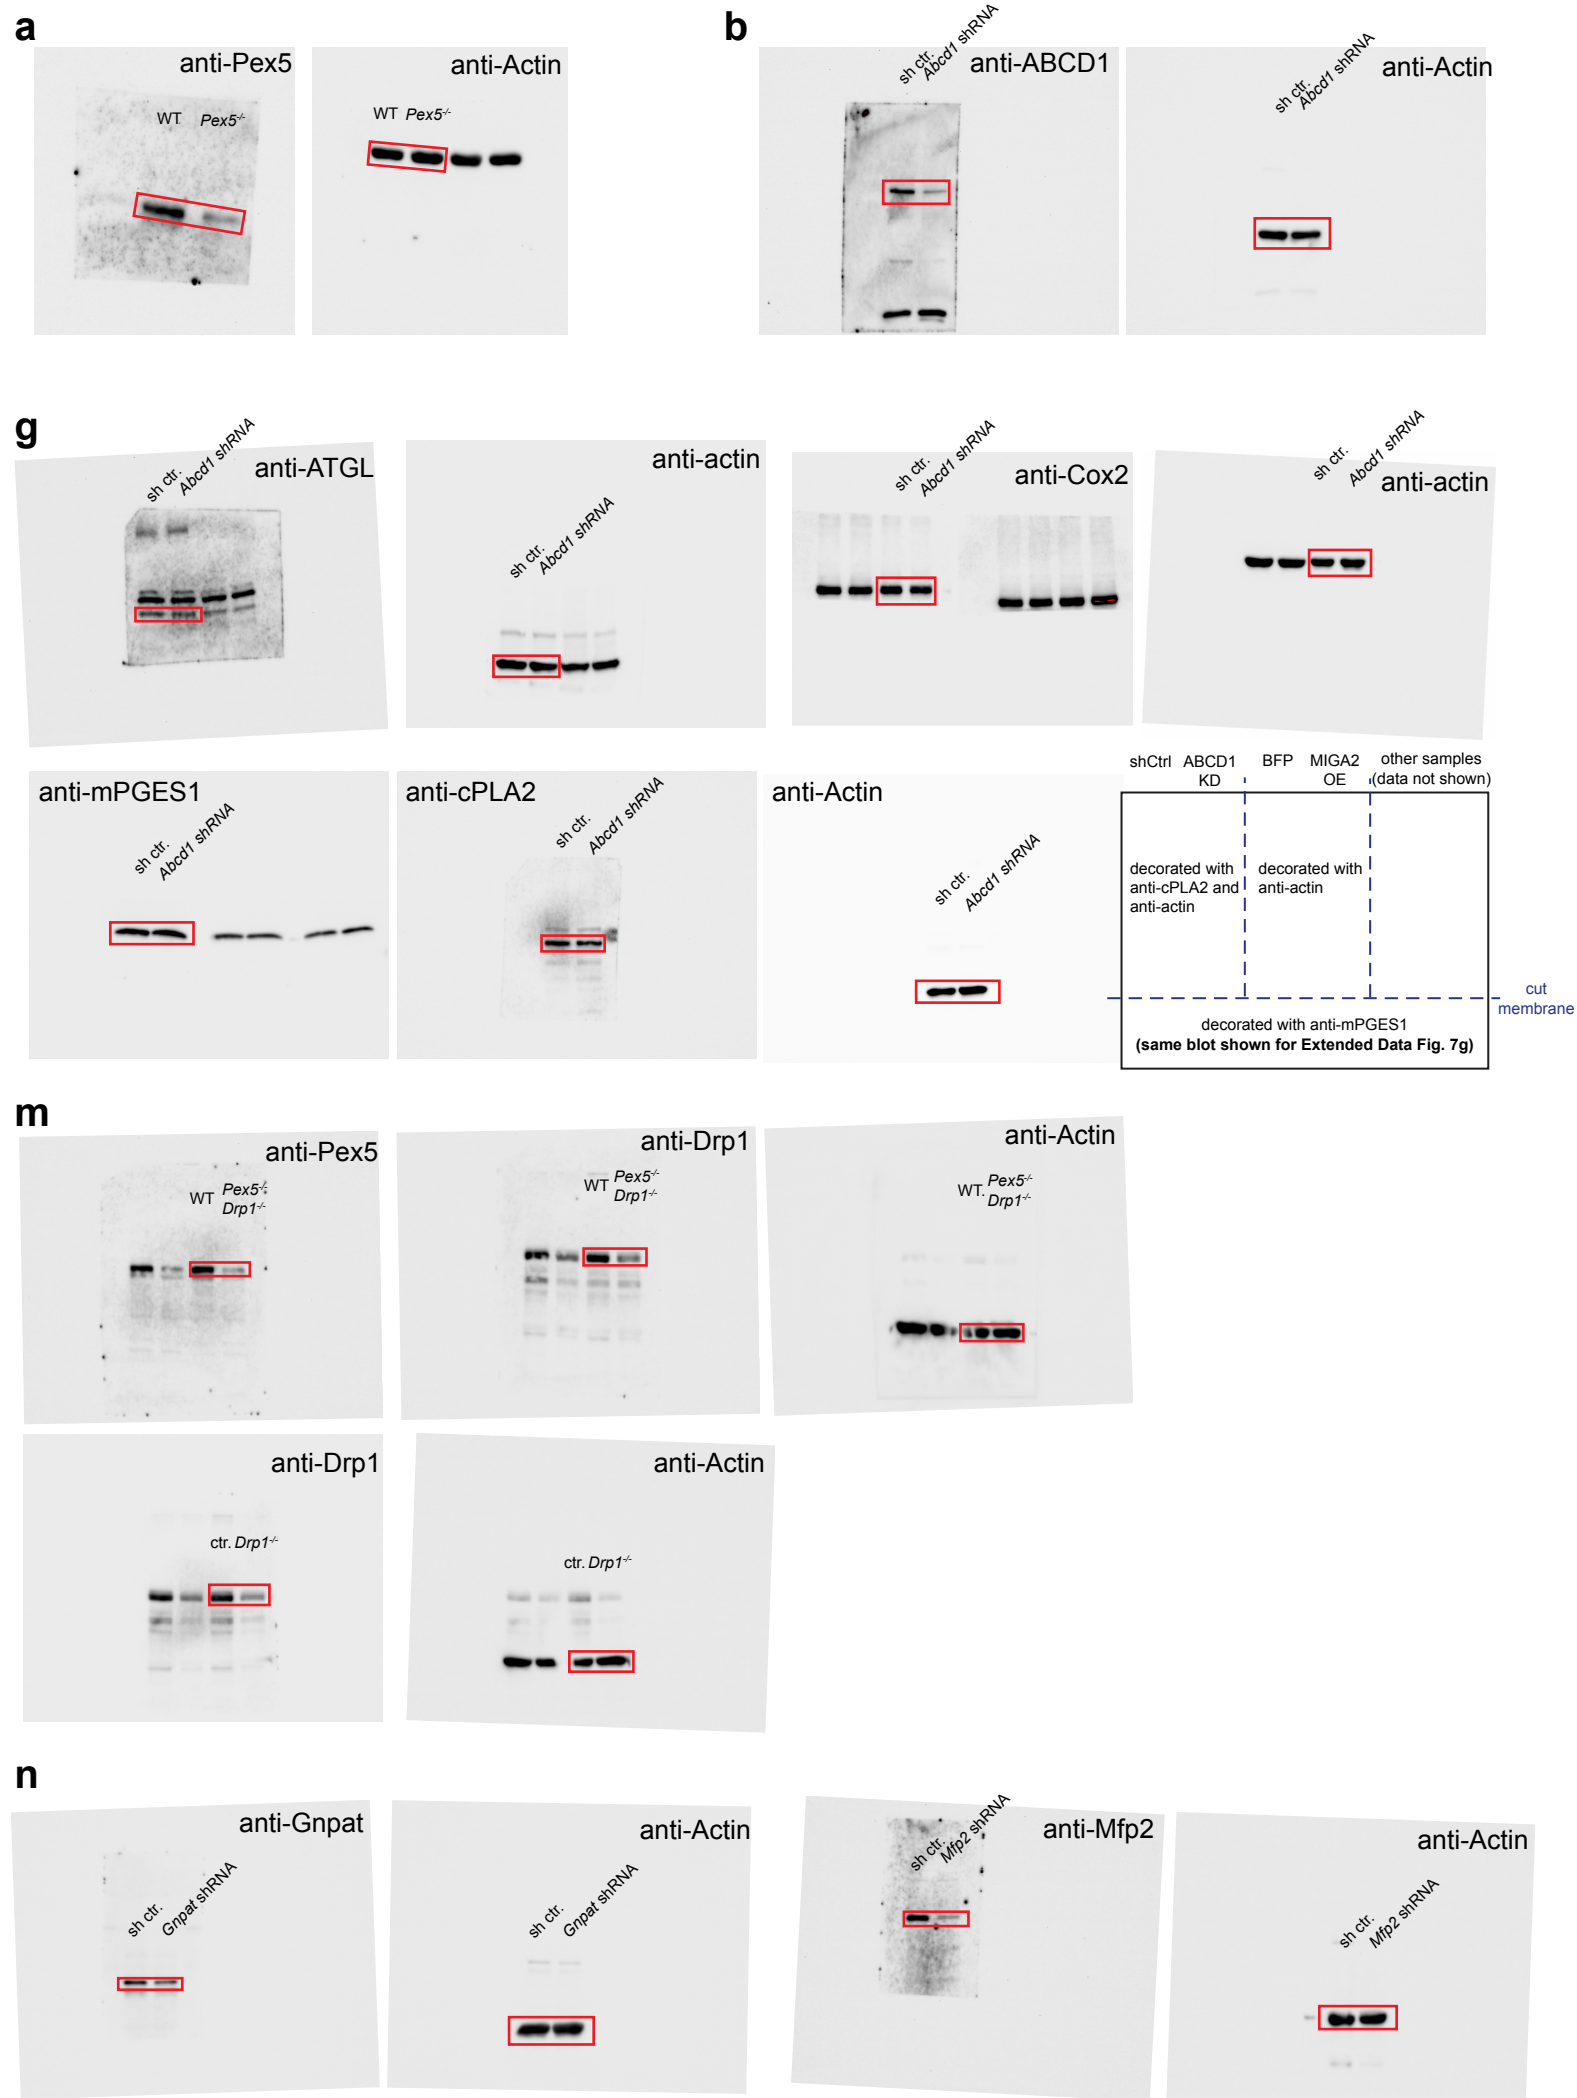

Supplement: 41556_2024_1457_MOESM25_ESM.pdf [file 41556_2024_1457_MOESM25_ESM.pdf]
